# Supplementary material for: Characterization of low pathogenicity avian influenza viruses isolated from wild birds in Mongolia 2005 through 2007
Source: PubMed Central journal article supplement (PMC2781007; doi:10.1186/1743-422x-6-190), 2009-11-05
Supplement: 1743-422X-6-190-S1.pdf [file 1743-422X-6-190-S1.pdf]

**Additional file 1.** Summary of rRT-PCR results for species testing positive for type A influenza.

| Species common name  | Species scientific name       | Fecal pools <sup>1</sup> | Total birds | Adults   | Juveniles | Healthy  | Sick  | Dead   |
|----------------------|-------------------------------|--------------------------|-------------|----------|-----------|----------|-------|--------|
| Whooper Swan         | <i>Cygnus cygnus</i>          | 9 (2) <sup>2</sup>       | 129 (13)    | 129 (13) |           | 129 (13) |       |        |
| Mixes swan spp.      | <i>Cygnus spp.</i>            | 21 (6)                   |             |          |           |          |       |        |
| Swan Goose           | <i>Anser cygnoides</i>        | 9 (0)                    | 23 (1)      | 23 (1)   |           | 23 (1)   |       |        |
| Bean Goose           | <i>Anser fabalis</i>          |                          | 21 (4)      | 21 (4)   |           | 21 (4)   |       |        |
| Bar-headed Goose     | <i>Anser indicus</i>          | 14 (1)                   | 122 (14)    | 122 (14) |           | 118 (14) | 1 (0) | 3 (0)  |
| Ruddy Shelduck       | <i>Tadorna ferruginea</i>     | 96 (3)                   | 34 (4)      | 21 (2)   | 13 (2)    | 33 (4)   |       | 1 (0)  |
| Common Shelduck      | <i>Tadorna tadorna</i>        | 9 (1)                    |             |          |           |          |       |        |
| Common Teal          | <i>Anas crecca</i>            | 24 (1)                   |             |          |           |          |       |        |
| Red-crested Pochard  | <i>Rhodonessa rufina</i>      | 39 (3)                   |             |          |           |          |       |        |
| Common Pochard       | <i>Aythya ferina</i>          | 26 (2)                   |             |          |           |          |       |        |
| Common Goldeneye     | <i>Bucephala clangula</i>     |                          | 1 (1)       | 1 (1)    |           |          | 1 (1) |        |
| Demoiselle Crane     | <i>Grus virgo</i>             | 3 (0)                    |             |          |           |          |       |        |
| Little-ringed Plover | <i>Charadrius dubius</i>      |                          | 2 (1)       | 1 (1)    | 1 (1)     | 2 (1)    |       |        |
| Northern Lapwing     | <i>Vanellus vanellus</i>      | 20 (1)                   | 1 (1)       |          | 1 (1)     |          |       | 1 (1)  |
| Mongolian Gull       | <i>Larus vagae mongolicus</i> | 61 (5)                   | 44 (5)      | 1 (1)    | 43 (5)    | 3 (0)    |       | 41 (5) |
| Black-headed Gull    | <i>Larus ridibundus</i>       | 62 (7)                   |             |          |           |          |       |        |
| White-winged Tern    | <i>Chlidonias leucopterus</i> |                          | 4 (1)       |          | 4 (1)     | 4 (1)    |       |        |

| Species common name   | Species scientific name       | Fecal pools <sup>1</sup> | Total birds | Adults   | Juveniles | Healthy  | Sick  | Dead   |
|-----------------------|-------------------------------|--------------------------|-------------|----------|-----------|----------|-------|--------|
| Great Cormorant       | <i>Phalacrocorax carbo</i>    | 126 (4)                  | 109 (6)     | 1 (1)    | 108 (6)   | 96 (6)   | 5 (0) | 8 (0)  |
| Bluethroat            | <i>Luscinia svecica</i>       |                          | 3 (1)       |          | 3 (1)     | 3 (1)    |       |        |
| Asian Short-toed Lark | <i>Calandrella cheleensis</i> |                          | 1 (1)       | 1 (1)    |           |          |       | 1 (1)  |
|                       | Total                         | 513 (36)                 | 494 (53)    | 321 (36) | 173 (17)  | 432 (45) | 7 (1) | 55 (7) |
|                       | Percentage positive           | 7.0%                     | 10.7%       | 11.2%    | 9.8%      | 10.4%    | 14.3% | 13.0%  |

1. Fecal pools contain 5 individual swabs.

2. Number of pool tested (number of type A influenza positive pools).
